# Supplementary material for: Mental Health Stigma Reduction Interventions Among Men: A Systematic Review
Source: PubMed Central journal article supplement (PMC11585030; doi:10.1177/15579883241299353), 2024-11-22
Supplement: sj-pdf-2-jmh-10.1177_15579883241299353.pdf [file sj-pdf-2-jmh-10.1177_15579883241299353.pdf]

|      |                | Screening Questions for all types                                                                                                                          |                                                                                                                                   |                                                                                                                                                                                             |                                                                             |                                                                                           | Qualitative                                           |                                                                             |                                                                                                 |                             |                                        | Quantitative RCT                 |                                                      |                                                       |                                                           | Quantitative Non-Randomised                                                                                                                                                                                |                                  |                                                               |                                                                                               |                                                                                     | Quantitative Descriptive                                       |                                                                                           |                                                                          |                                                                                         |                                                                                | Mixed Methods                                                                                       |                                                                                                        |                                                                                                       |    |    | Final Score | Strength | Reasons |    |    |    |     |          |                                                                                                                                                                                                                                                                                       |                                                                                                                                                                                                                                                                                                                                                                                                                                                                                                                                                                                                                                                                                                                                                                                                                                                                                                                                                                     |                                                                                                                                                                                                                                                                                                                   |                                                                                                                                                                                                                                                                                                                                                                       |
|------|----------------|------------------------------------------------------------------------------------------------------------------------------------------------------------|-----------------------------------------------------------------------------------------------------------------------------------|---------------------------------------------------------------------------------------------------------------------------------------------------------------------------------------------|-----------------------------------------------------------------------------|-------------------------------------------------------------------------------------------|-------------------------------------------------------|-----------------------------------------------------------------------------|-------------------------------------------------------------------------------------------------|-----------------------------|----------------------------------------|----------------------------------|------------------------------------------------------|-------------------------------------------------------|-----------------------------------------------------------|------------------------------------------------------------------------------------------------------------------------------------------------------------------------------------------------------------|----------------------------------|---------------------------------------------------------------|-----------------------------------------------------------------------------------------------|-------------------------------------------------------------------------------------|----------------------------------------------------------------|-------------------------------------------------------------------------------------------|--------------------------------------------------------------------------|-----------------------------------------------------------------------------------------|--------------------------------------------------------------------------------|-----------------------------------------------------------------------------------------------------|--------------------------------------------------------------------------------------------------------|-------------------------------------------------------------------------------------------------------|----|----|-------------|----------|---------|----|----|----|-----|----------|---------------------------------------------------------------------------------------------------------------------------------------------------------------------------------------------------------------------------------------------------------------------------------------|---------------------------------------------------------------------------------------------------------------------------------------------------------------------------------------------------------------------------------------------------------------------------------------------------------------------------------------------------------------------------------------------------------------------------------------------------------------------------------------------------------------------------------------------------------------------------------------------------------------------------------------------------------------------------------------------------------------------------------------------------------------------------------------------------------------------------------------------------------------------------------------------------------------------------------------------------------------------|-------------------------------------------------------------------------------------------------------------------------------------------------------------------------------------------------------------------------------------------------------------------------------------------------------------------|-----------------------------------------------------------------------------------------------------------------------------------------------------------------------------------------------------------------------------------------------------------------------------------------------------------------------------------------------------------------------|
| Code | Author & Year  | Paper                                                                                                                                                      | Are there clear qualitative and quantitative research questions for objectives? (i.e. clear mixed method question for objective?) | Do the collected data address the research question(s)? (i.e., consider whether the follow-up period is long enough for the outcome to occur for longitudinal studies or study components). | 1. Is the qualitative approach appropriate to answer the research question? | 2. Are the qualitative data collection methods adequate to address the research question? | 3. Are the findings adequately derived from the data? | 4. Is the interpretation of the results sufficiently substantiated by data? | 5. Is there coherence between quantitative data sources, collection, analysis & interpretation? | Is randomisation performed? | Are the groups comparable at baseline? | Are there complete outcome data? | Are outcome assessments blinded by the intervention? | Did participants adhere to the assigned intervention? | Are participants representative of the target population? | 2. Are measurements appropriate (clear, single, or validity known, or standard instrument; and absence of contamination between groups when appropriate regarding the exposure/intervention and outcomes)? | Are there complete outcome data? | Are the confounders accounted for in the design and analysis? | During the study period, is the intervention administered (or exposure occurred) as intended? | 1. Is the sampling strategy relevant to address the quantitative research question? | 2. Is the sample representative of the population of interest? | 3. Are measurement appropriate (clear origin, or validity known, or standard instrument)? | Is the statistical analysis appropriate to answer the research question? | Is there an adequate rationale for using mixed methods to answer the research question? | Are the different components of the study effectively integrated and reported? | Are the outputs of the integration of qualitative and quantitative components adequately addressed? | Are divergences and inconsistencies between quantitative and qualitative results adequately addressed? | Do different components of the study adhere to the quality criteria of each tradition of the methods? |    |    |             |          |         |    |    |    |     |          |                                                                                                                                                                                                                                                                                       |                                                                                                                                                                                                                                                                                                                                                                                                                                                                                                                                                                                                                                                                                                                                                                                                                                                                                                                                                                     |                                                                                                                                                                                                                                                                                                                   |                                                                                                                                                                                                                                                                                                                                                                       |
| 7    | Morrow 2019    | Intersectionality as an analytic Framework for understanding the Experiences of mental health stigma among racialized men                                  | Yes                                                                                                                               | Yes                                                                                                                                                                                         | Yes                                                                         | Yes                                                                                       | Can't tell                                            | Yes                                                                         | Yes                                                                                             |                             |                                        |                                  |                                                      |                                                       |                                                           |                                                                                                                                                                                                            |                                  |                                                               |                                                                                               |                                                                                     |                                                                |                                                                                           |                                                                          |                                                                                         |                                                                                |                                                                                                     |                                                                                                        |                                                                                                       |    |    |             |          |         |    |    |    | 80% | Moderate | 1. Yes. 2. Yes. 3. Can't tell - does not report on data analysis method and does not use participant names/ages/focus group numbers not reported so can't tell where it is derived from. 4. Yes. 5. Yes. 6. clear link between all                                                    |                                                                                                                                                                                                                                                                                                                                                                                                                                                                                                                                                                                                                                                                                                                                                                                                                                                                                                                                                                     |                                                                                                                                                                                                                                                                                                                   |                                                                                                                                                                                                                                                                                                                                                                       |
| 1    | Fung 2021a     | Exploring mechanisms of mental illness stigma reduction in Asian Canadian Men                                                                              | Yes                                                                                                                               | Yes                                                                                                                                                                                         |                                                                             |                                                                                           |                                                       |                                                                             |                                                                                                 | Can't tell                  | Can't tell                             | Yes                              | Can't tell                                           | Can't tell                                            |                                                           |                                                                                                                                                                                                            |                                  |                                                               |                                                                                               |                                                                                     |                                                                |                                                                                           |                                                                          |                                                                                         |                                                                                |                                                                                                     |                                                                                                        |                                                                                                       |    |    |             |          |         |    |    |    | 20% | Weak     | 1. Generic statement "participants were randomly assigned" but does not state how. 2. Does not report differences in participant baseline data once randomised/cannot determine if comparable or not. 3. High % of people report at 3 months. 4. Not reported. 5. Yes. Single session |                                                                                                                                                                                                                                                                                                                                                                                                                                                                                                                                                                                                                                                                                                                                                                                                                                                                                                                                                                     |                                                                                                                                                                                                                                                                                                                   |                                                                                                                                                                                                                                                                                                                                                                       |
| 4    | Kohrt 2021     | Collaboration with people with lived experience of mental illness to reduce stigma and improve primary care services                                       | Yes                                                                                                                               | Yes                                                                                                                                                                                         |                                                                             |                                                                                           |                                                       |                                                                             |                                                                                                 | Yes                         | Yes                                    | Yes                              | Yes                                                  | Can't Tell                                            |                                                           |                                                                                                                                                                                                            |                                  |                                                               |                                                                                               |                                                                                     |                                                                |                                                                                           |                                                                          |                                                                                         |                                                                                |                                                                                                     |                                                                                                        |                                                                                                       |    |    |             |          |         |    |    |    |     | 80%      | Moderate                                                                                                                                                                                                                                                                              | 1. Randomization well described. 2. Baseline characteristics described, no significant differences. 3. Yes, 73-76% completed intervention and control. 4. States assessors are blinded in abstract. 5. States assessors adhere/compliance to intervention. 6. Yes computer randomisation/blinding stated. 7. Yes, clearly stated. 8. Yes - 88.8% of data completed. (103 participants in total, 4 variables and 3 time points (total of 1236 possible responses [103x4x3]. 403 responses at baseline, 329 responses at post, 366 responses at follow-up [1086 in total]. 1086 responses/1236 possible responses = 88.8% completion rate. 9. Does not report. 10. No. Average of 4.76 modules completed out of 11 (43% adherence rate). 11. Does not report on randomisation process. 12. Does not report differences in baseline characteristics, only key variables at baseline. 13. High % of people report at 3 months. 14. No reported. 15. Yes. Single session |                                                                                                                                                                                                                                                                                                                   |                                                                                                                                                                                                                                                                                                                                                                       |
| 8    | Nickerson 2019 | Tell your Story: A Randomised controlled trial of an online intervention to reduce mental health stigma and increase help-seeking in refugee men with PTSD | Yes                                                                                                                               | Yes                                                                                                                                                                                         |                                                                             |                                                                                           |                                                       |                                                                             |                                                                                                 | Yes                         | Yes                                    | Yes                              | Can't Tell                                           | No                                                    |                                                           |                                                                                                                                                                                                            |                                  |                                                               |                                                                                               |                                                                                     |                                                                |                                                                                           |                                                                          |                                                                                         |                                                                                |                                                                                                     |                                                                                                        |                                                                                                       |    |    |             |          |         |    |    |    |     | 60%      | Moderate                                                                                                                                                                                                                                                                              | 1. Does not report on randomisation process. 2. Does not report differences in baseline characteristics following randomisation. 3. Yes - 87% completion rate 4. Does not report 5. Does not report adherence to interventions                                                                                                                                                                                                                                                                                                                                                                                                                                                                                                                                                                                                                                                                                                                                      |                                                                                                                                                                                                                                                                                                                   |                                                                                                                                                                                                                                                                                                                                                                       |
| 13   | Szydek 2013    | A pilot trial of gender-based motivational interviewing for help-seeking and internalizing symptoms in men                                                 | Yes                                                                                                                               |                                                                                                                                                                                             |                                                                             |                                                                                           |                                                       |                                                                             |                                                                                                 | Can't tell                  | Can't tell                             | Yes                              | Can't tell                                           | Yes                                                   |                                                           |                                                                                                                                                                                                            |                                  |                                                               |                                                                                               |                                                                                     |                                                                |                                                                                           |                                                                          |                                                                                         |                                                                                |                                                                                                     |                                                                                                        |                                                                                                       |    |    |             |          |         |    |    |    |     |          | 40%                                                                                                                                                                                                                                                                                   | Weak                                                                                                                                                                                                                                                                                                                                                                                                                                                                                                                                                                                                                                                                                                                                                                                                                                                                                                                                                                | 1. Does not report on randomisation process. 2. Does not report differences in baseline characteristics following randomisation. 3. Yes - 87% completion rate 4. Does not report 5. Does not report adherence to interventions                                                                                    |                                                                                                                                                                                                                                                                                                                                                                       |
| 16   | Fung 2021b     | Examining Different Strategies for Stigma Reduction and Mental                                                                                             | Yes                                                                                                                               | Yes                                                                                                                                                                                         |                                                                             |                                                                                           |                                                       |                                                                             |                                                                                                 | Can't tell                  | Can't tell                             | Yes                              | Can't tell                                           | Can't tell                                            |                                                           |                                                                                                                                                                                                            |                                  |                                                               |                                                                                               |                                                                                     |                                                                |                                                                                           |                                                                          |                                                                                         |                                                                                |                                                                                                     |                                                                                                        |                                                                                                       |    |    |             |          |         |    |    |    |     |          | 20%                                                                                                                                                                                                                                                                                   | Weak                                                                                                                                                                                                                                                                                                                                                                                                                                                                                                                                                                                                                                                                                                                                                                                                                                                                                                                                                                | 1. 88 of 90 available sample participated. 2. No - developed own quiz, OMS-WA psychometric properties not validated. 3. No, 79% completion at follow-up. 4. Only accounted for age and education. Did not account for other demographics 5. Yes, appears people participated as intended (single session)         |                                                                                                                                                                                                                                                                                                                                                                       |
| 2    | Hanisch 2017   | Development and evaluation of digital game-based training for managers to promote employee mental health and reduce mental illness stigma at work          | Yes                                                                                                                               | Yes                                                                                                                                                                                         |                                                                             |                                                                                           |                                                       |                                                                             |                                                                                                 |                             |                                        |                                  |                                                      |                                                       | Yes                                                       | No                                                                                                                                                                                                         | No                               | No                                                            | Yes                                                                                           |                                                                                     |                                                                |                                                                                           |                                                                          |                                                                                         |                                                                                |                                                                                                     |                                                                                                        |                                                                                                       |    |    |             |          |         |    |    |    |     |          |                                                                                                                                                                                                                                                                                       | 40%                                                                                                                                                                                                                                                                                                                                                                                                                                                                                                                                                                                                                                                                                                                                                                                                                                                                                                                                                                 | Weak                                                                                                                                                                                                                                                                                                              | 1. No, only conducted with one company and two mines. 2. Yes - stigma included in "barriers to help-seeking" 3. Yes, 95% complete. 4. Yes, accounted for in analysis. 5. Does not report                                                                                                                                                                              |
| 11   | Sayer 2019     | Does help seeking behaviour change over time following a workplace mental health intervention in the coal mining industry                                  | Yes                                                                                                                               | Yes                                                                                                                                                                                         |                                                                             |                                                                                           |                                                       |                                                                             |                                                                                                 |                             |                                        |                                  |                                                      |                                                       | No                                                        | Yes                                                                                                                                                                                                        | Yes                              | Yes                                                           | Can't tell                                                                                    |                                                                                     |                                                                |                                                                                           |                                                                          |                                                                                         |                                                                                |                                                                                                     |                                                                                                        |                                                                                                       |    |    |             |          |         |    |    |    |     |          | 60%                                                                                                                                                                                                                                                                                   | Moderate                                                                                                                                                                                                                                                                                                                                                                                                                                                                                                                                                                                                                                                                                                                                                                                                                                                                                                                                                            | 1. No. Sampling from one clinic, population not described in depth. 2. Yes, clearly described. 3. Yes, 6% drop-out rate 4. No, background characteristics or other treatments not accounted for in analysis. 5. Participants may have been exposed to other treatments during intervention and not accounted for. |                                                                                                                                                                                                                                                                                                                                                                       |
| 12   | Shimozu 2014   | Effectiveness of group CBT in reducing self stigma in Japanese psychiatric patients                                                                        | Yes                                                                                                                               | Yes                                                                                                                                                                                         |                                                                             |                                                                                           |                                                       |                                                                             |                                                                                                 |                             |                                        |                                  |                                                      |                                                       | No                                                        | Yes                                                                                                                                                                                                        | Yes                              | No                                                            | No                                                                                            |                                                                                     |                                                                |                                                                                           |                                                                          |                                                                                         |                                                                                |                                                                                                     |                                                                                                        |                                                                                                       |    |    |             |          |         |    |    |    |     |          |                                                                                                                                                                                                                                                                                       | 40%                                                                                                                                                                                                                                                                                                                                                                                                                                                                                                                                                                                                                                                                                                                                                                                                                                                                                                                                                                 | Weak                                                                                                                                                                                                                                                                                                              | 1. 8/10 mines involved, stratification to ensure representative cross-section of industry. 2. Yes, clearly described. 3. No - average of site response rates 75.7% (for WWWWMP & control) 4. No - did not account for any confounders 5. Yes, single session & appears it was delivered as planned                                                                    |
| 14   | Tynan 2018     | Feasibility and acceptability of strategies to address mental health and mental ill-health in the Australian coal mining industry                          | Yes                                                                                                                               | Yes                                                                                                                                                                                         |                                                                             |                                                                                           |                                                       |                                                                             |                                                                                                 |                             |                                        |                                  |                                                      |                                                       | Yes                                                       | Yes                                                                                                                                                                                                        | No                               | No                                                            | Yes                                                                                           |                                                                                     |                                                                |                                                                                           |                                                                          |                                                                                         |                                                                                |                                                                                                     |                                                                                                        |                                                                                                       |    |    |             |          |         |    |    |    |     |          |                                                                                                                                                                                                                                                                                       | 60%                                                                                                                                                                                                                                                                                                                                                                                                                                                                                                                                                                                                                                                                                                                                                                                                                                                                                                                                                                 | Moderate                                                                                                                                                                                                                                                                                                          | 1. Target participants well described. 2. Developed own scale to assess attitudes towards mental health and only selected some of these questions. 3. No - 72% completion rate across all timepoints (144 responses out of possible 200) 4. No did not account for any confounders 5. Yes appeared to be delivered as intended                                        |
| 15   | Voorhees 2012  | Pilot study of internet-based early intervention for combat-related mental distress                                                                        | Yes                                                                                                                               | Yes                                                                                                                                                                                         |                                                                             |                                                                                           |                                                       |                                                                             |                                                                                                 |                             |                                        |                                  |                                                      |                                                       | Yes                                                       | No                                                                                                                                                                                                         | No                               | No                                                            | Yes                                                                                           |                                                                                     |                                                                |                                                                                           |                                                                          |                                                                                         |                                                                                |                                                                                                     |                                                                                                        |                                                                                                       |    |    |             |          |         |    |    |    |     |          |                                                                                                                                                                                                                                                                                       | 40%                                                                                                                                                                                                                                                                                                                                                                                                                                                                                                                                                                                                                                                                                                                                                                                                                                                                                                                                                                 | Weak                                                                                                                                                                                                                                                                                                              | 1. No - just states that the evaluation was complex. 2. No - reports the qual and quant data separately without any attempt to integrate data 3. No - does not integrate data in interpretation 4. No - does not report any differences between qual and quant data. 5. No - does not adequately report on the descriptive design element of this study methods study |
| 10   | Robinson 2014  | Influencing public awareness to prevent male suicide                                                                                                       | Yes                                                                                                                               | Yes                                                                                                                                                                                         |                                                                             |                                                                                           |                                                       |                                                                             |                                                                                                 |                             |                                        |                                  |                                                      |                                                       |                                                           |                                                                                                                                                                                                            |                                  |                                                               |                                                                                               |                                                                                     |                                                                |                                                                                           |                                                                          |                                                                                         |                                                                                |                                                                                                     |                                                                                                        |                                                                                                       |    |    |             |          |         |    |    |    |     |          |                                                                                                                                                                                                                                                                                       | 0%                                                                                                                                                                                                                                                                                                                                                                                                                                                                                                                                                                                                                                                                                                                                                                                                                                                                                                                                                                  | Weak                                                                                                                                                                                                                                                                                                              | 1. No - reports the qual and quant data separated without any attempt to integrate. 2. No - does not report on meta-interference sufficiently. 3. Yes - discusses differences in findings between the two methods used.                                                                                                                                               |
| 17   | Woods 2020     | Developing mental health awareness and help-seeking in prison.                                                                                             | Yes                                                                                                                               | Yes                                                                                                                                                                                         |                                                                             |                                                                                           |                                                       |                                                                             |                                                                                                 |                             |                                        |                                  |                                                      |                                                       |                                                           |                                                                                                                                                                                                            |                                  |                                                               |                                                                                               |                                                                                     |                                                                |                                                                                           |                                                                          |                                                                                         |                                                                                |                                                                                                     | No                                                                                                     | No                                                                                                    | No | No | No          | No       | No      | No | No | No | No  | No       |                                                                                                                                                                                                                                                                                       | 40%                                                                                                                                                                                                                                                                                                                                                                                                                                                                                                                                                                                                                                                                                                                                                                                                                                                                                                                                                                 | Weak                                                                                                                                                                                                                                                                                                              |                                                                                                                                                                                                                                                                                                                                                                       |
